# Supplementary material
Source: publisher site journal article supplement (http://www.spandidos-publications.com/5952/downloadSupplementary)

Figure S1. Amplification plot of the patient in early December 2022. The Ct values for ORFlab gene, N gene and E gene of the patient were all <40, indicating severe acute respiratory syndrome coronavirus 2-positivity.

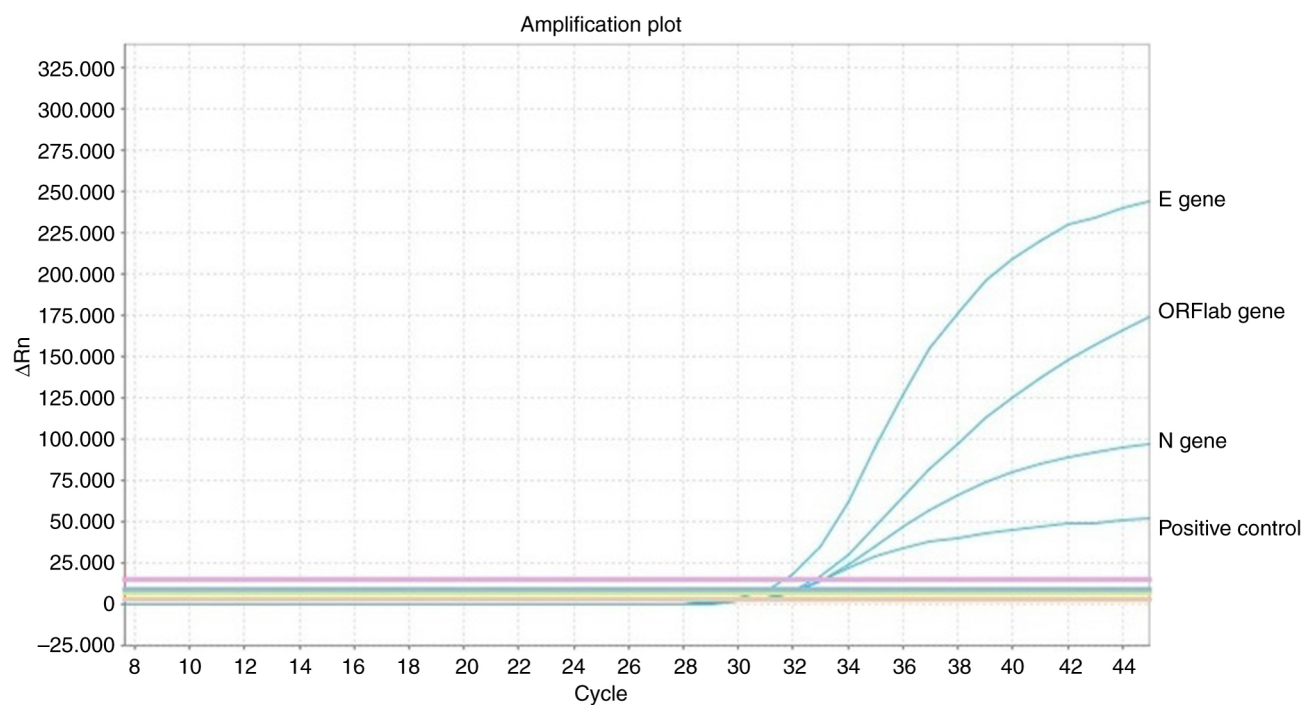

Supplement: Supplementary file 1 [file downloadSupplementary]
